# Supplementary material for: Functional Response and Predation Rate of Dicyphus cerastii Wagner (Hemiptera: Miridae)
Source: MDPI journal article supplement (doi:10.3390/insects12060530), 2021-06-07
Supplement: s1 [file s1]

**Table S1.** Parameters  $a$  (attack rate) and  $h$  (handling time), standard error (S.E.) and respective bootstrapped 95% confidence intervals estimated by Rogers's random predator equation (Type II functional response) for *Dicyphus cerastii* females feeding on different prey species (*Bemisia tabaci* 4<sup>th</sup> instar nymphs, *Ephestia kuehniella* eggs, *Myzus persicae* 1<sup>st</sup> instar nymphs or *Tuta absoluta* eggs).

| Prey                       | Parameter | Estimate               | S.E.                   | 95%CI Lower | 95%CI Upper | z *    | p-Value |
|----------------------------|-----------|------------------------|------------------------|-------------|-------------|--------|---------|
| <i>Bemisia tabaci</i>      | $a$       | 4.566                  | $1.724 \times 10^{-1}$ | 3.864       | 5.372       | 26.486 | <0.001  |
|                            | $h$       | $9.596 \times 10^{-3}$ | $1.730 \times 10^{-4}$ | 0.008       | 0.011       | 55.481 | <0.001  |
| <i>Ephestia kuehniella</i> | $a$       | 4.416                  | $1.342 \times 10^{-1}$ | 3.632       | 5.307       | 32.900 | <0.001  |
|                            | $h$       | $6.057 \times 10^{-3}$ | $9.761 \times 10^{-5}$ | 0.005       | 0.007       | 62.058 | <0.001  |
| <i>Myzus persicae</i>      | $a$       | 3.280                  | $1.767 \times 10^{-1}$ | 2.781       | 3.863       | 18.567 | <0.001  |
|                            | $h$       | $2.125 \times 10^{-2}$ | $7.662 \times 10^{-4}$ | 0.018       | 0.025       | 27.732 | <0.001  |
| <i>Tuta absoluta</i>       | $a$       | 5.931                  | $2.105 \times 10^{-1}$ | 4.789       | 7.597       | 28.179 | <0.001  |
|                            | $h$       | $4.427 \times 10^{-3}$ | $7.711 \times 10^{-5}$ | 0.004       | 0.005       | 57.401 | <0.001  |

\* z-statistics value to the test of the parameter difference from zero and the corresponding  $p$ -value
