# Supplementary material for: Functional Response and Predation Rate of Dicyphus cerastii Wagner (Hemiptera: Miridae)
Source: MDPI journal article supplement (doi:10.3390/insects12060530), 2021-06-07
Supplement: s1 [file s1]

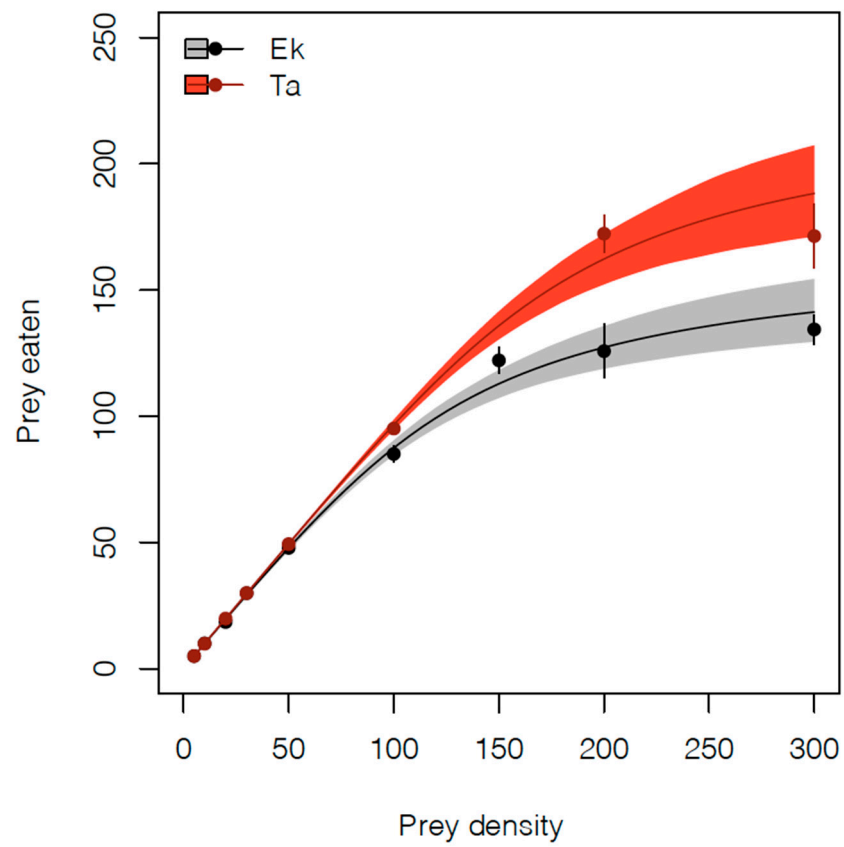

**Figure S1.** Functional response curves of *Dicyphus cerastii* females when preying on *Ephestia kuehniella* (Ek) and *Tuta absoluta* eggs (Ta). Dots represent the average consumption and bars the respective standard error. Shaded areas represent bootstrapped 95% confidence intervals.
